# Supplementary material
Source: Springer Nature journal article supplement (https://www.springermedizin.de/resource/supplementary/12875_2010_608_MOESM2_ESM.pdf/9435058)
Supplement: MOESM2 [file 9435058]

**25 intervention and  
53 control GPs**

**Identification of dispensed prescriptions  
(1<sup>st</sup> January through 31<sup>st</sup> March 2001 and 2003)  
from National Prescription Register**

Antihypertensives (ATC code C02)  
Diuretics (C03)  
Peripheral vasodilators (C04)  
Beta-blocking agents (C07)  
Calcium channel blockers (C08)  
Agents acting on the RAAS (C09)

**Data for each prescription**

ATC code 5th level  
Generic preparation  
Disease number code (Code for Special Refund)  
Patient information (patient code, gender and age)

**Patient specific data**

**1. Combination drugs were recoded into separate chemical subgroups**

**2. Duplicate purchases deleted if at least one prescription**

Antihypertensives (C02)  
Diuretics (C03)  
Peripheral vasodilators (C04)  
Beta-blocking agents (C07)  
Calcium channel blockers (C08)  
Agents acting on the RAAS (C09)

**Analysis in patient subgroups**

**1) Hypertension only**

No redeemed prescriptions for  
diabetes (ATC A10)  
or  
under the special refund for CHD

**2) Hypertension and CHD**

Redeemed prescriptions  
under the special refund for CHD  
and  
No redeemed prescriptions for  
diabetes (ATC A10)

**3) Hypertension and diabetes**

Redeemed prescriptions for  
diabetes (ATC A10)
